# Supplementary material for: Wrinkle and near-resonance effects on the vibrational and electronic properties in compressed monolayer MoSe2
Source: Royal Society of Chemistry journal article supplement (doi:10.1039/d0cp06283a), 2021-01-01
Supplement: d0cp06283a1.pdf [file d0cp06283a1.pdf]

## Supporting Information

### Wrinkle and Near Resonance Effect on the Vibrational and Electronic properties in Compressed Monolayer MoSe<sub>2</sub>

*Yan Liu,<sup>a</sup> Qiang Zhou,<sup>a</sup> Yalan Yan,<sup>b</sup> Liang Li,<sup>a</sup> Jian Zhu,<sup>a</sup> YuLu Zheng,<sup>a</sup> Xiaoli Huang,<sup>a</sup> Yanping Huang,<sup>a</sup> Fangfei Li\*,<sup>a</sup> and Tian Cui<sup>a,c</sup>*

<sup>a</sup> State Key Laboratory of Superhard Materials, College of Physics, Jilin University, Changchun, 130012, China

<sup>b</sup> Institute for Interdisciplinary Biomass Functional Materials Studies, Jilin Engineering Normal University, No. 3050 Kaixuan Road, Changchun 130052, China

<sup>c</sup> School of Physical Science and Technology, Ningbo University, Ningbo 315211, China

#### Corresponding Authors

\* Fangfei Li: E-mail: [lifangfei@jlu.edu.cn](mailto:lifangfei@jlu.edu.cn).

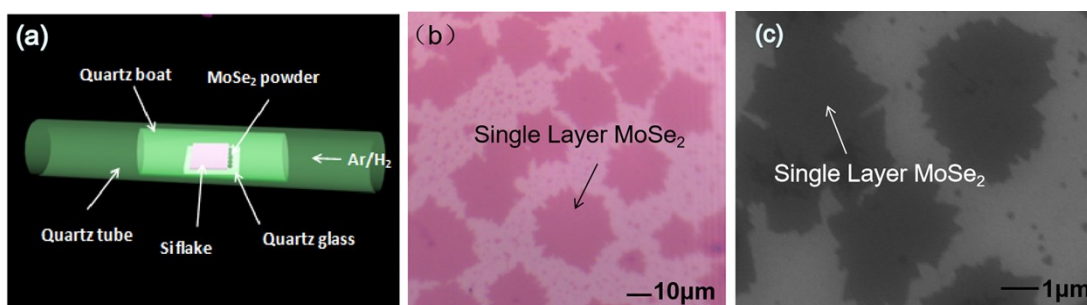

**Figure S1.** (a) Schematic illustration for the growth of monolayer MoSe<sub>2</sub> on Si/SiO<sub>2</sub> substrate. MoSe<sub>2</sub> powders were placed in a quartz tube as the precursor. Argon and H<sub>2</sub> were used as the carrier gas. (b) Optical image and (c) scanning electron microscopy (SEM) image of monolayer MoSe<sub>2</sub> deposited on Si/SiO<sub>2</sub> substrate.

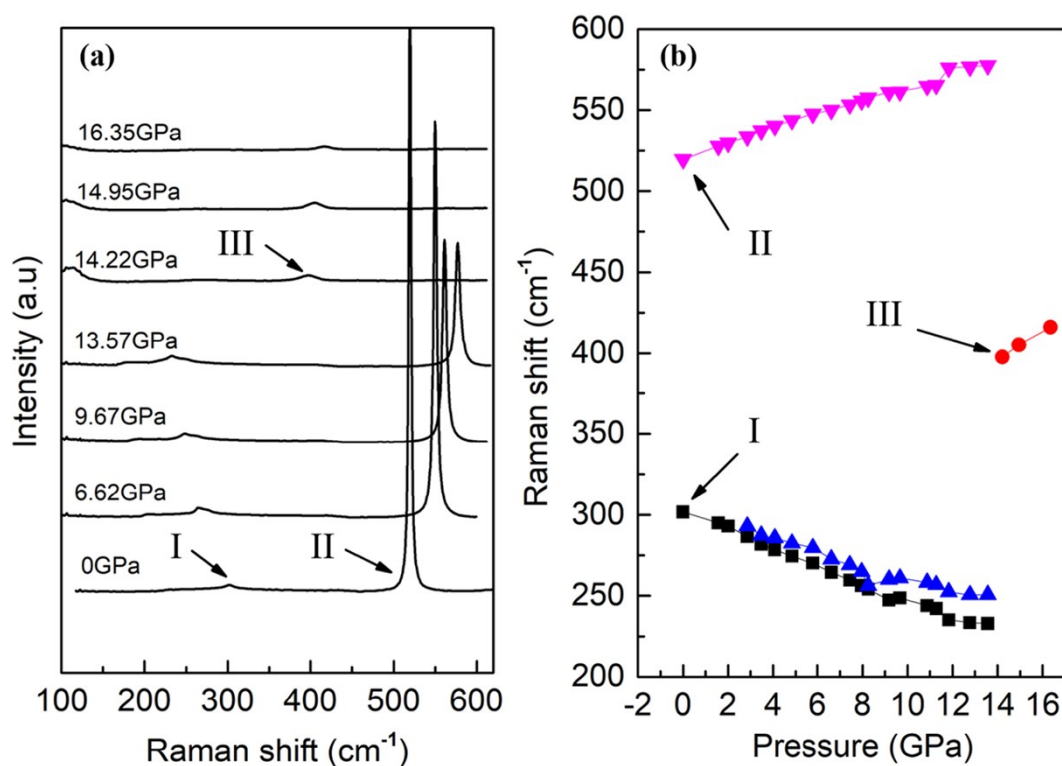

**Figure S2.** (a) The Raman spectra of Si/SiO<sub>2</sub> substrate at selected pressures. (b) Pressure dependent Raman frequencies of mode I, II, and III in Si/SiO<sub>2</sub> substrate. A novel mode marked as “mode III” emerges after 14.22 GPa.

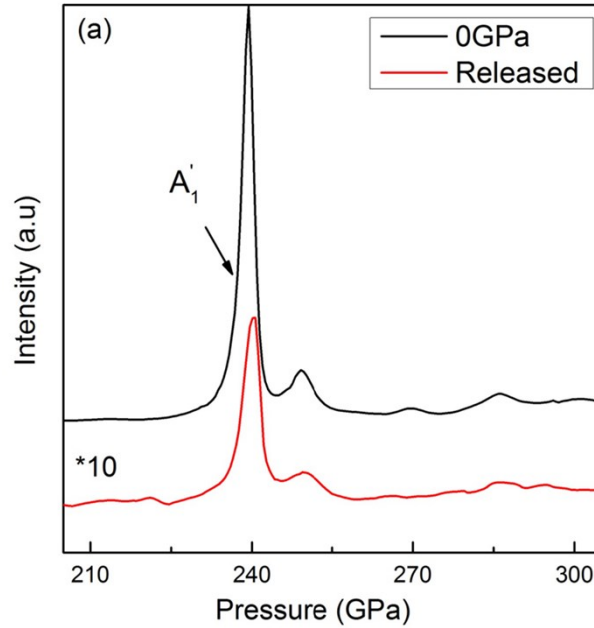

**Figure S3. (a)** The Raman spectra of monolayer MoSe<sub>2</sub> supported on Si/SiO<sub>2</sub> substrate at ambient condition and after removing pressure. When compared with the Raman spectra of monolayer MoSe<sub>2</sub> at ambient condition, the Raman frequencies after removing pressure exhibit a slightly blue shift, which should be related with the residual strain from the substrate deformation. The intensity of released Raman on Si/SiO<sub>2</sub> seriously decreases, which can be attributed to the structural distortions of monolayer MoSe<sub>2</sub> owing to the distortion of Si/SiO<sub>2</sub> substrate under high pressure.

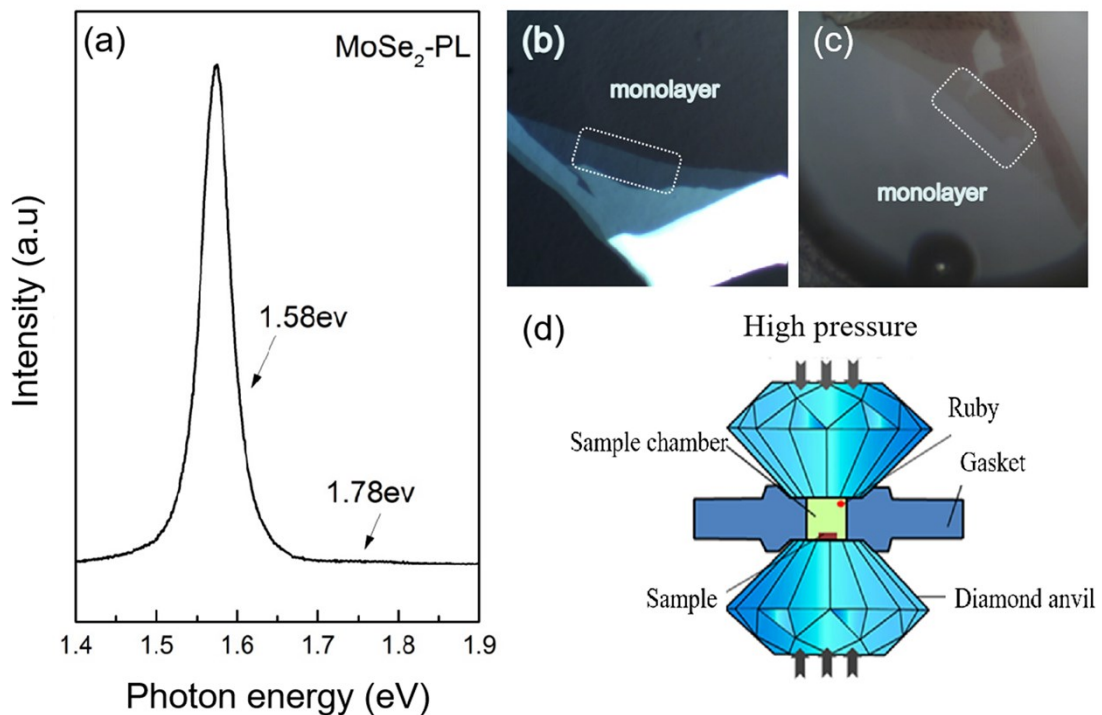

**Figure S4.** (a) The PL spectra of exfoliated monolayer MoSe<sub>2</sub> at ambient condition. A and B excitons were located at 1.58eV (785nm) and 1.78eV (697nm), respectively. (b) The image of monolayer MoSe<sub>2</sub> exfoliated onto the PDMS substrate. (c) The image of exfoliated monolayer MoSe<sub>2</sub> on diamond anvil. (d) Schematic diagram of the DAC for high-pressure PL, Raman and absorption experiments.

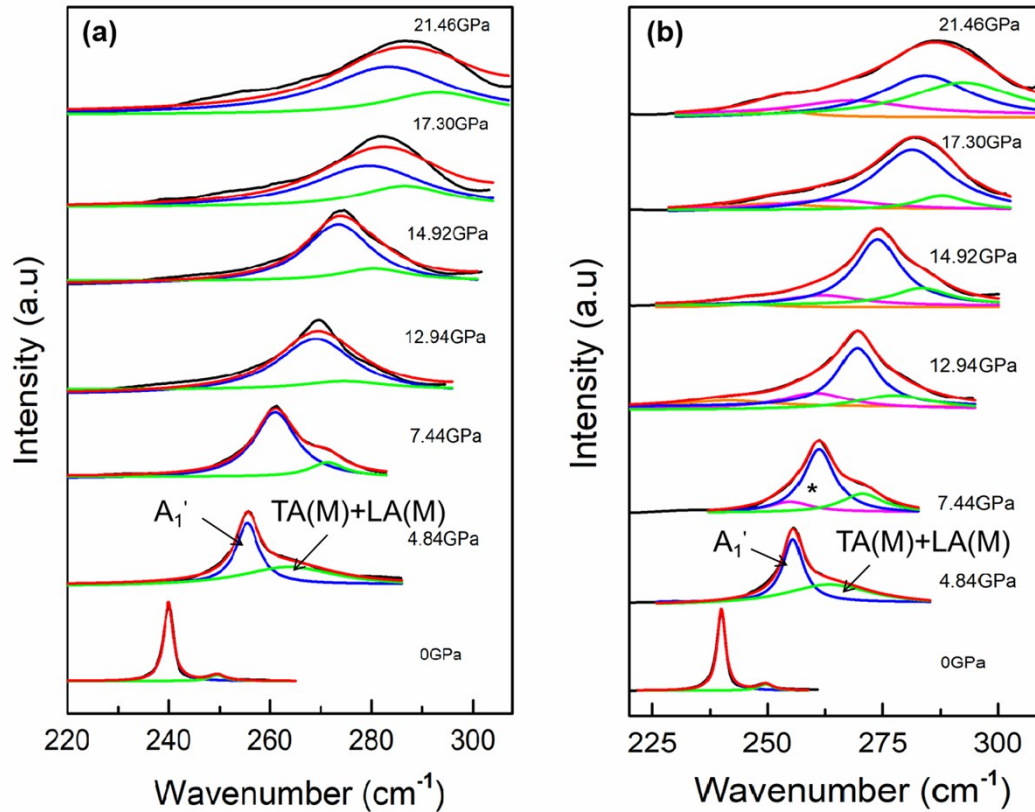

**Figure S5.** (a) A two-peak fit of the Raman spectra of compressed monolayer MoSe<sub>2</sub> at the range of 220-310 cm<sup>-1</sup>. (b) A three-peak fit of the Raman spectra of compressed monolayer MoSe<sub>2</sub> at the range of 220-310 cm<sup>-1</sup>.

### The discussion about the adhered state in PVD-grown monolayer MoSe<sub>2</sub>

According to the previous report (*Nature Materials*, **2011**, 10, 282-285.), the surface corrugations of graphene on SiO<sub>2</sub> are much larger as compared to that on hBN, (Figure 1) which can be attributed to the fact that, the graphene is well conformed to the substrate and the planar nature of hBN as compared with the amorphous SiO<sub>2</sub>. That is, the 2D materials should be well conformed to the substrates. Furthermore, considering the fact that, our monolayer MoSe<sub>2</sub> is prepared by PVD method, the topographic image of monolayer MoSe<sub>2</sub> should be fully adhered to the substrate

thanks to the deposition process.

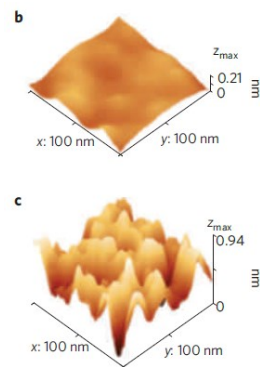

**Figure 6** (b) STM topographic image of monolayer graphene on hBN showing the underlying surface corrugations. (c) STM topographic image of monolayer graphene on SiO<sub>2</sub> showing markedly increased corrugations. *Nature Materials*, **2011**, 10, 282-285.
